# Supplementary material for: Organometallic ruthenium anticancer complexes inhibit human peroxiredoxin I activity by binding to and inducing oxidation of its catalytic cysteine residue
Source: Royal Society of Chemistry journal article supplement (doi:10.1039/c8mt00352a), 2019-01-17
Supplement: c8mt00352a1.pdf [file c8mt00352a1.pdf]

**Supporting Information for**

**Organometallic Ruthenium Anticancer Complexes Inhibit the  
Human Peroxiredoxin I Activity by Binding to and Inducing  
Oxidation of Its Catalytic Cysteine Residue**

Yu Lin,<sup>a†</sup> Jie Wang,<sup>a,b†</sup> Wei Zheng,<sup>a</sup> Qun Luo,<sup>a,c</sup> Kui Wu,<sup>a</sup> Jun Du,<sup>\*b</sup> Yao Zhao,<sup>\*a</sup>  
Fuyi Wang<sup>\*a,c</sup>

<sup>a</sup> Beijing National Laboratory for Molecular Sciences; National Centre for Mass Spectrometry in Beijing; CAS Key Laboratory of Analytical Chemistry for Living Biosystems; CAS Research/Education Center for Excellence in Molecular Sciences; Institute of Chemistry, Chinese Academy of Sciences, Beijing 100190, PR China.

E-mail: [fuyi.wang@iccas.ac.cn](mailto:fuyi.wang@iccas.ac.cn); [yaozhao@iccas.ac.cn](mailto:yaozhao@iccas.ac.cn);

<sup>b</sup> College of Chemistry and Materials Science, Key Laboratory of Functional Molecular Solids, the Ministry of Education, Anhui Laboratory of Molecular-Based Materials, Anhui Normal University, Wuhu, 241000, P. R. China

E-mail: [dujun@mail.ahnu.edu.cn](mailto:dujun@mail.ahnu.edu.cn)

<sup>c</sup> University of Chinese Academy of Sciences, Beijing, 100049, P. R. China

† Both authors contributed equally to this work.

**Table of contents.**

**1. Scheme S1**

**2. Table S1-S2**

**3. Figure S1-S4**

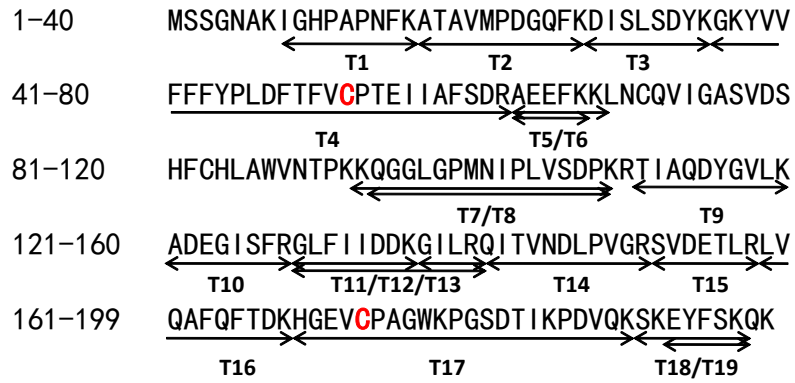

**Scheme S1.** Schematic representation of identified peptides by HPLC-ESI-MS from the tryptic digestion of Prx-I. The sequence coverage of the identified peptides is 82.4%. The catalytic sites Cys52 and Cys173 are in bold and red.

**Table S1.** Peptides identified in mass spectrometry arising from tryptic digestion of recombinant Prx-I.

| Peptides | (position)sequence                 | charge | $m/z$    | $m/z$    | $\delta^b$ /ppm |
|----------|------------------------------------|--------|----------|----------|-----------------|
| T1       | (8-16)IGHPAPNFK                    | 1+     | 327.515  | 327.515  | -0.31           |
|          |                                    | 2+     | 490.769  | 490.771  | 3.06            |
|          |                                    | 3+     | 980.531  | 980.545  | 13.97           |
| T2       | (17-27)ATAVMPDGQFK                 | 1+     | 1164.571 | 1164.557 | -12.88          |
|          |                                    | 2+     | 582.791  | 582.783  | -11.84          |
| T3       | (28-35)DISLSDYK                    | 1+     | 940.462  | 940.452  | -10.74          |
|          |                                    | 2+     | 470.735  | 470.740  | 11.68           |
| T4       | (36-62)GKYVVFFFYPLDFTFVCPTEIIAFSDR | 2+     | 1612.309 | 1612.318 | 5.46            |
|          |                                    | 3+     | 1074.874 | 1074.893 | 17.11           |
| T5       | (63-67)AEEFK                       | 1+     | 623.304  | 623.312  | 14.28           |
|          |                                    | 2+     | 312.156  | 312.157  | 1.92            |
| T6       | (63-68)AEEFKK                      | 1+     | 751.399  | 751.384  | -19.43          |
|          |                                    | 2+     | 376.203  | 376.197  | -2.39           |
| T7       | (93-109)KQGGLGPMNIPLVSDPK          | 2+     | 875.980  | 875.972  | -8.56           |
|          |                                    | 3+     | 584.322  | 584.319  | -5.31           |
| T8       | (94-109)QGGLGPMNIPLVSDPK           | 2+     | 811.932  | 811.927  | -6.90           |
|          |                                    | 3+     | 541.624  | 541.621  | -5.72           |
| T9       | (111-120)TIAQDYGVLK                | 1+     | 1107.605 | 1107.596 | -7.58           |
|          |                                    | 2+     | 554.306  | 554.306  | -0.36           |
| T10      | (121-128)ADEGISFR                  | 1+     | 894.432  | 894.426  | -6.26           |
|          |                                    | 2+     | 447.719  | 477.728  | 14.23           |
| T11      | (129-136)GLFIIDDK                  | 1+     | 920.509  | 920.504  | -5.21           |
|          |                                    | 2+     | 460.758  | 460.759  | 1.95            |
| T12      | (129-140)GLFIIDDKGILR              | 1+     | 1359.799 | 1359.778 | -16.11          |
|          |                                    | 2+     | 680.403  | 680.397  | -9.11           |
|          |                                    | 3+     | 453.938  | 453.935  | -5.95           |
| T13      | (137-140)GILR                      | 1+     | 458.309  | 458.301  | -17.02          |
| T14      | (141-151)QITVNDLPVGR               | 1+     | 1211.674 | 1211.684 | 8.17            |
|          |                                    | 2+     | 606.341  | 606.346  | 7.92            |
|          |                                    | 3+     | 404.563  | 404.560  | 8.40            |
| T15      | (152-158)SVDETLR                   | 1+     | 819.421  | 819.405  | -18.79          |
|          |                                    | 2+     | 410.214  | 410.206  | -19.99          |
| T16      | (159-168)LVQAFQFTDK                | 1+     | 1196.631 | 1196.646 | 12.20           |
|          |                                    | 2+     | 598.819  | 598.828  | 13.86           |
| T17      | (169-190)HGEVCPAGWKPGSDTIKPDVQK    | 2+     | 1175.588 | 1175.580 | -6.90           |
|          |                                    | 3+     | 784.061  | 784.057  | -5.36           |
|          |                                    | 4+     | 588.298  | 588.295  | -4.59           |
| T18      | (191-197)SKEYFSK                   | 1+     | 888.446  | 888.435  | -12.38          |
|          |                                    | 2+     | 444.727  | 444.716  | -24.73          |
|          |                                    | 3+     | 296.823  | 296.821  | -3.37           |
| T19      | (193-197)EYFSK                     | 1+     | 673.319  | 673.309  | 14.54           |
|          |                                    | 2+     | 337.163  | 337.157  | 18.09           |

a. The theoretical (theor.) and observed (obs.) mass-to-charge ratio of the most abundant isotopomers.

b.  $\delta = [(m/z)_{\text{obs}} - (m/z)_{\text{theor}}] / (m/z)_{\text{theor}}$ .

**Table S2.** The minimized energies of different entities calculated by Sybyl X 1.1.

| Entity                                     | Prx-I   | <b>1</b> | <b>2</b> | <b>3</b> |
|--------------------------------------------|---------|----------|----------|----------|
| Minimized energy (kcal mol <sup>-1</sup> ) | -2769.7 | 675.5    | 656.6    | 664.4    |

  

| Entity                                     | Prx-I + <b>1</b> | Prx-I + <b>2</b> | Prx-I + <b>3</b> |
|--------------------------------------------|------------------|------------------|------------------|
| Minimized energy (kcal mol <sup>-1</sup> ) | -2576.2          | -2434.8          | -2472.6          |
| Binding energy (kcal mol <sup>-1</sup> )   | -482.0           | -321.7           | -367.3           |

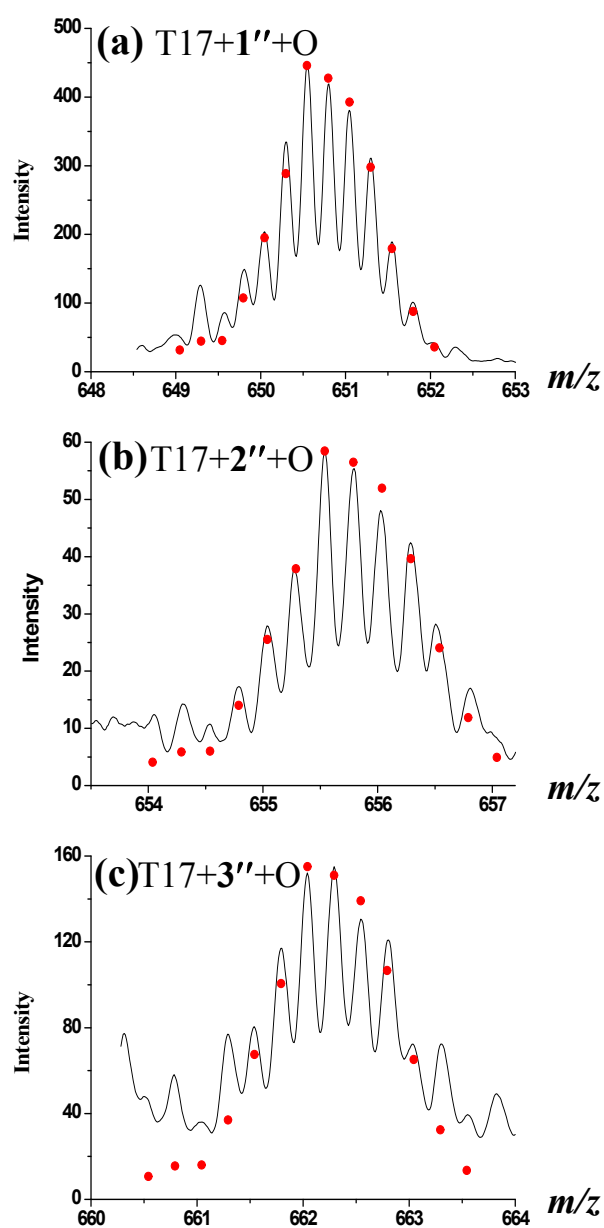

**Figure S1.** Mass spectra (lines) and isotopic models (red dots) for ruthenated peptides T17 arising from tryptic digestion of ruthenated Prx-I complexes, Prx-I + **1**, Prx-I + **2** and Prx-I + **3**, respectively. T17 = (aa169-aa190) HGEVCPAGWKPGSDTIKPDVQK; **1''** =  $\{(\eta^6\text{-}p\text{-cym})\text{Ru}\}^{2+}$ ; **2''** =  $\{(\eta^6\text{-bip})\text{Ru}\}^{2+}$ ; **3''** =  $\{(\eta^6\text{-dhp})\text{Ru}\}^{2+}$ . The red dots correspond to the simulated isotopic peaks of ruthenated T17, respectively.

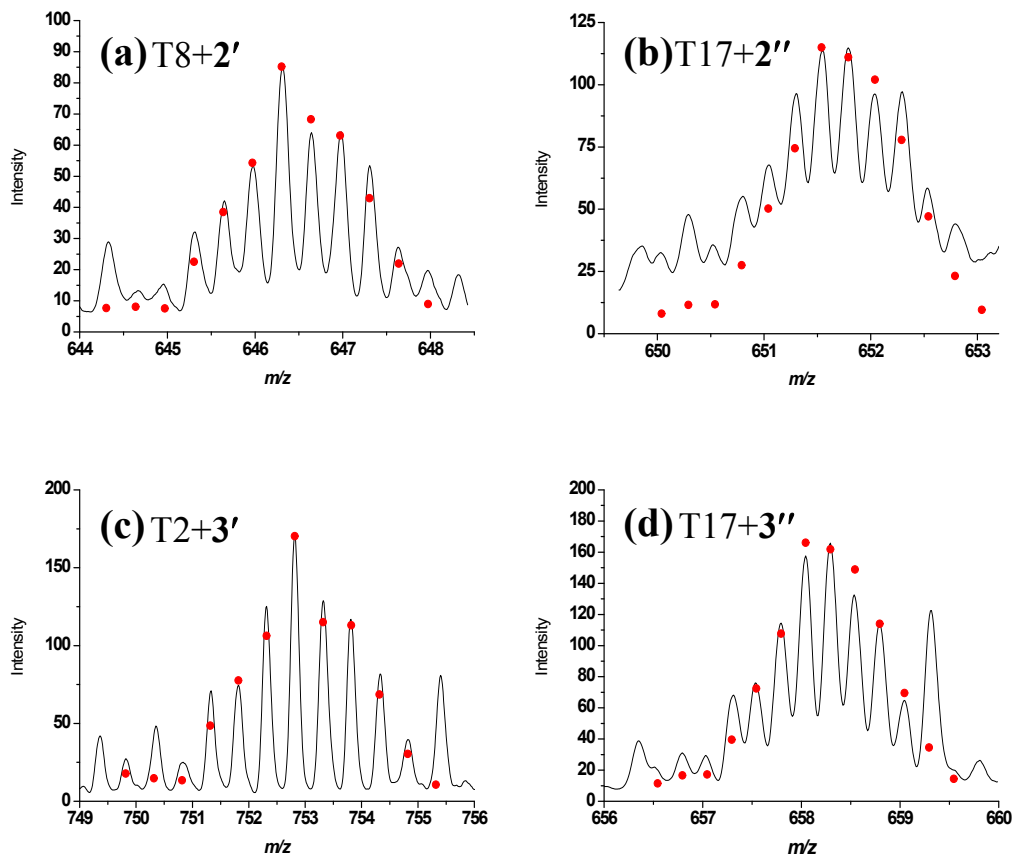

**Figure S2.** Mass spectra (lines) and isotopic models (red dots) for ruthenated peptides arising from tryptic digestion of ruthenated Prx-I complexes Prx-I + **2** and Prx-I + **3**, respectively. T2 = (aa17-aa27) ATAVMPDGQFK; T8 = (aa94-aa109) QGGLGPMNIPLVSDPK; T17 = (aa169-aa190) HGEVCPAGWKPGSDTIKPDVQK; **2'** =  $\{(\eta^6\text{-bip})\text{Ru}(\text{en})\}^{2+}$ ; **3'** =  $\{(\eta^6\text{-dhpa})\text{Ru}(\text{en})\}^{2+}$ ; **2''** =  $\{(\eta^6\text{-bip})\text{Ru}\}^{2+}$ ; **3''** =  $\{(\eta^6\text{-dhpa})\text{Ru}\}^{2+}$ . The red dots correspond to the simulated isotopic peaks of ruthenated peptides, respectively.

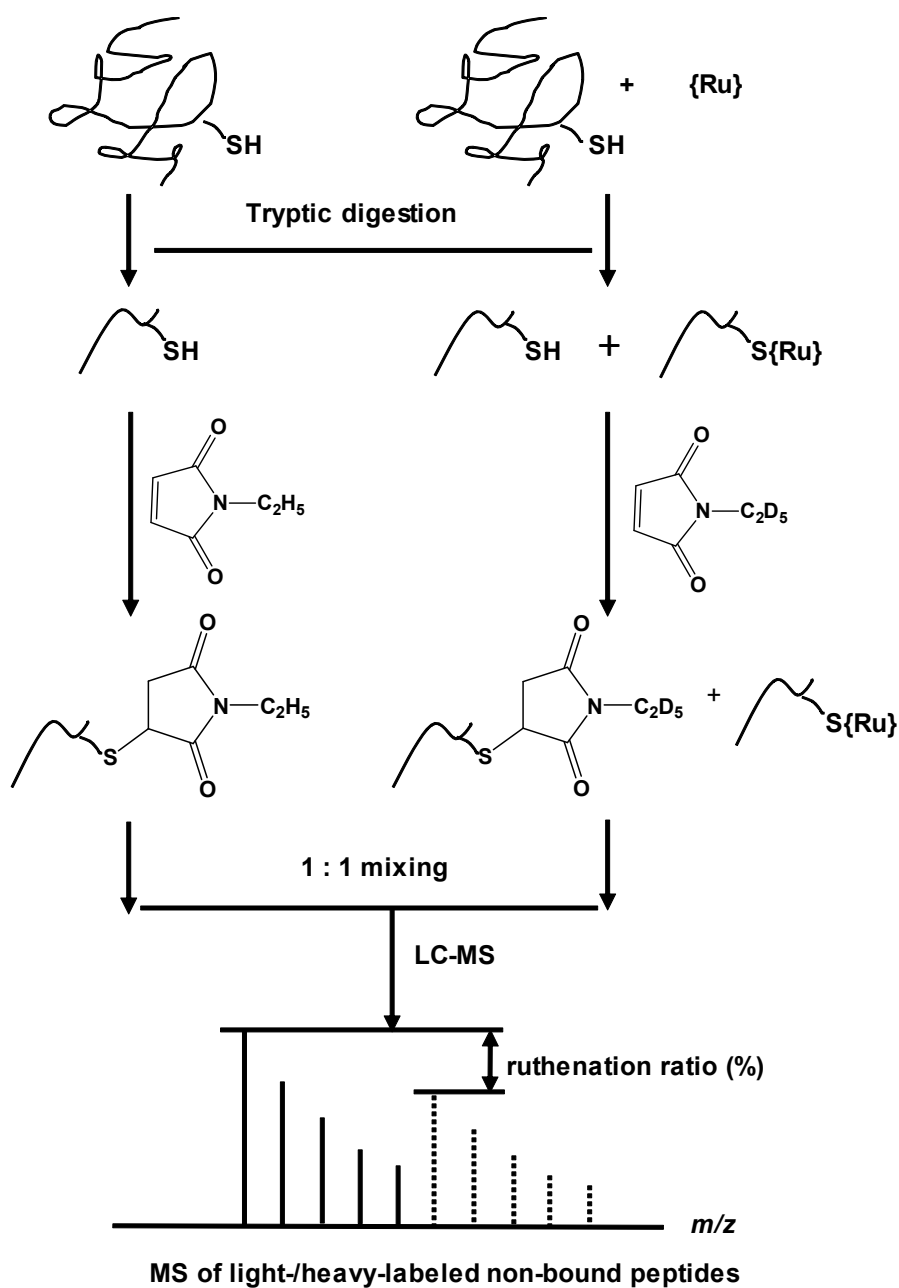

**Figure S3.** Diagram for the measurement of binding stoichiometry of the ruthenium complexes to a cysteine thiol of protein.  $\{Ru\} = [(\eta^6\text{-arene})Ru(en)]^{2+}$  or  $[(\eta^6\text{-arene})Ru]^{2+}$ .



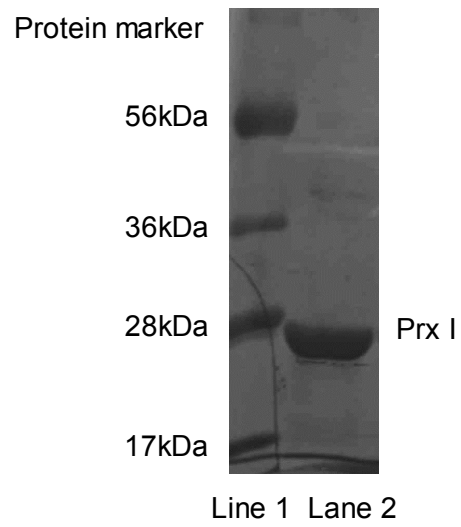

**Figure S4.** SDS-PAGE of recombinant Prx-I eluted by buffer C (Lane 2), indicating the purity of recombinant Prx-I is about 95%.
